# Supplementary material for: Individuals with JAK1 variants are affected by syndromic features encompassing autoimmunity, atopy, colitis, and dermatitis
Source: PubMed Central journal article supplement — J Exp Med. 2024 Apr 2;221(6):e20232387. doi: 10.1084/jem.20232387 (PMC10986756; doi:10.1084/jem.20232387), 2024-04-02

Figure 2a

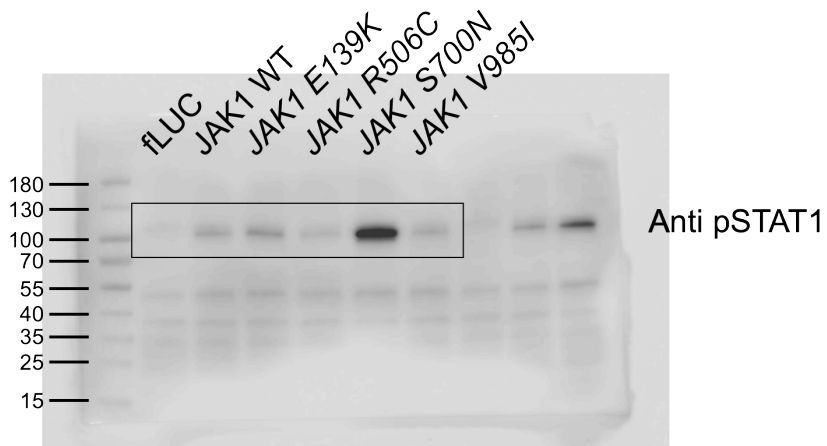

Figure 2a

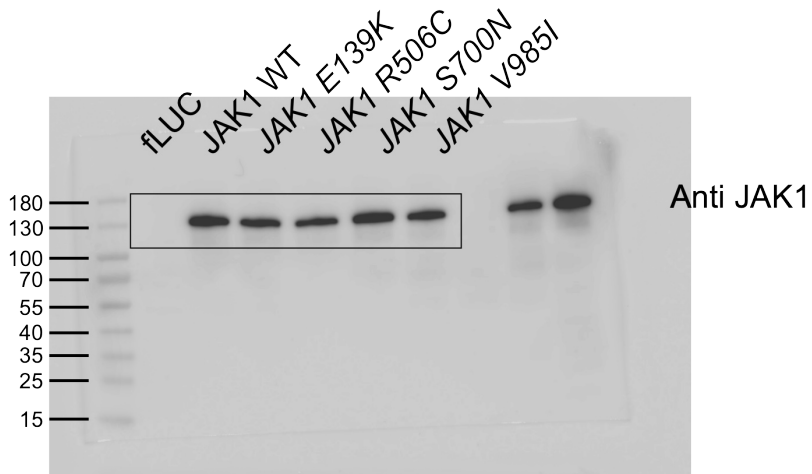

Figure 2a

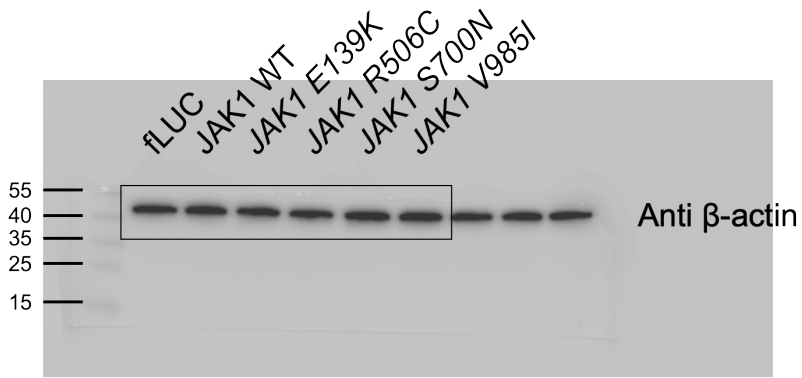

Figure 2b

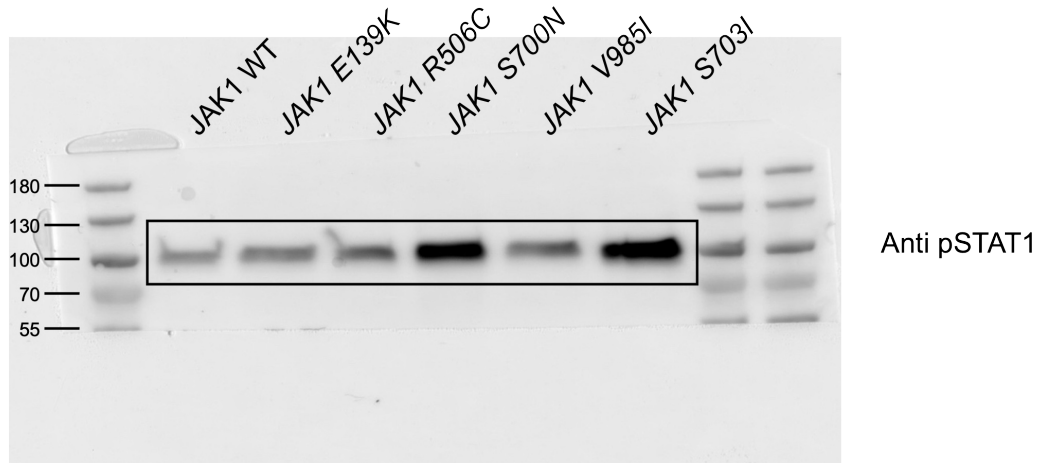

Figure 2b

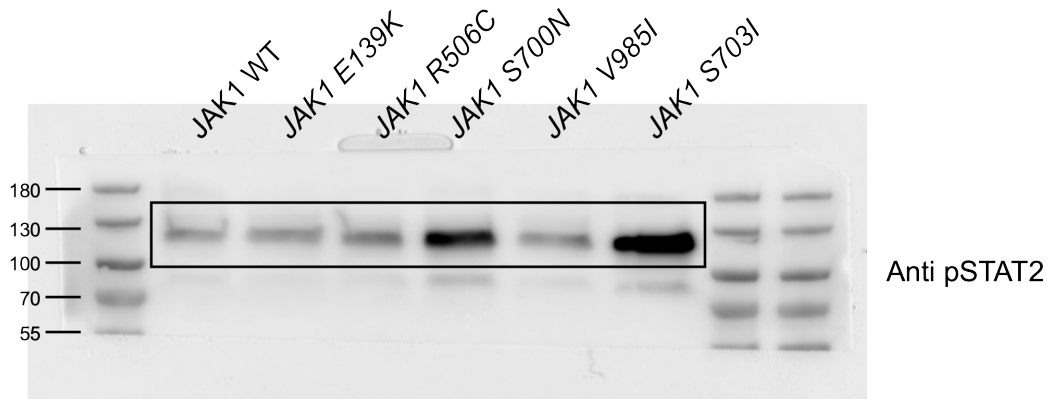

Figure 2b

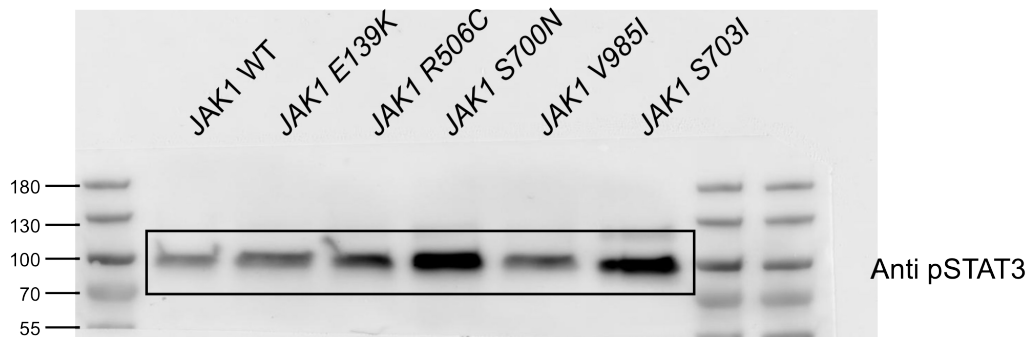

Figure 2b

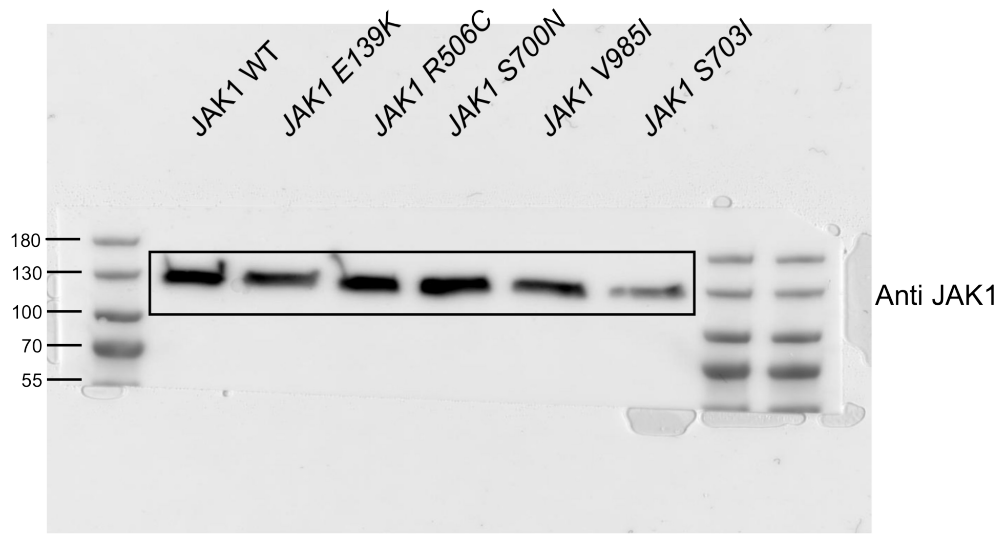

Figure 2b

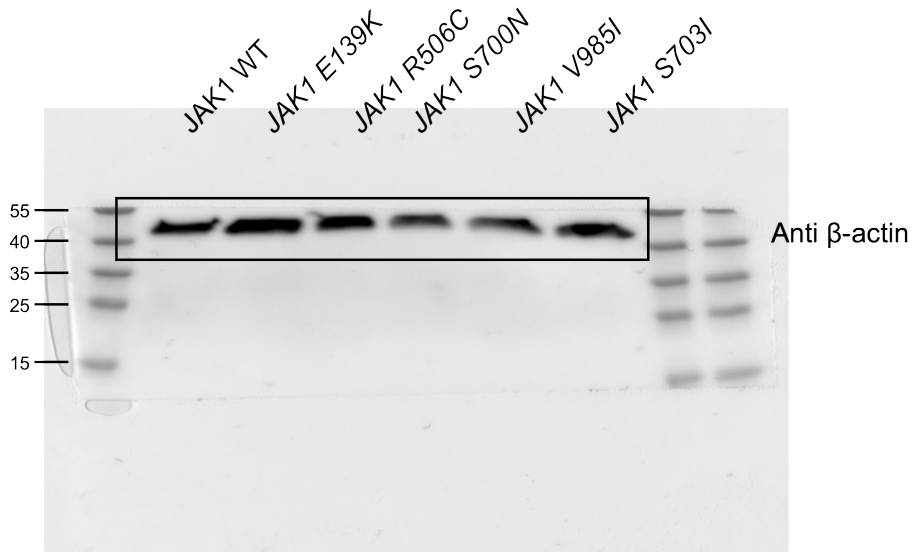



Figure 2f

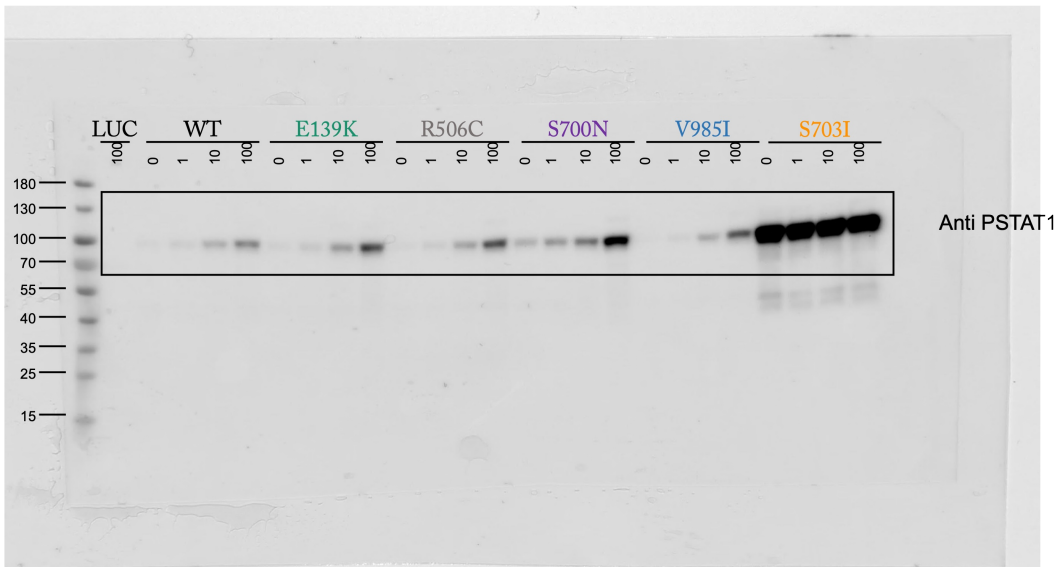

Figure 2f

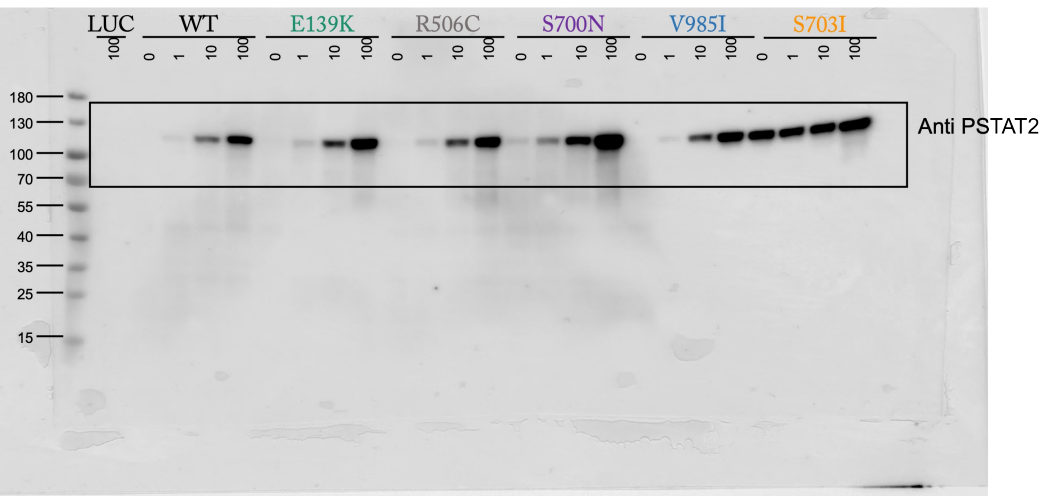

Figure 2f

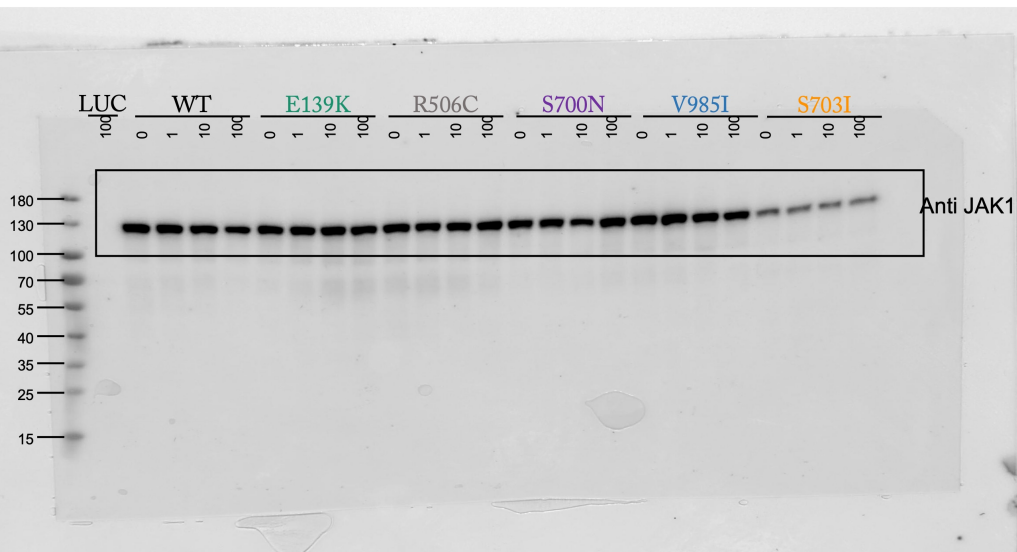

Figure 2f

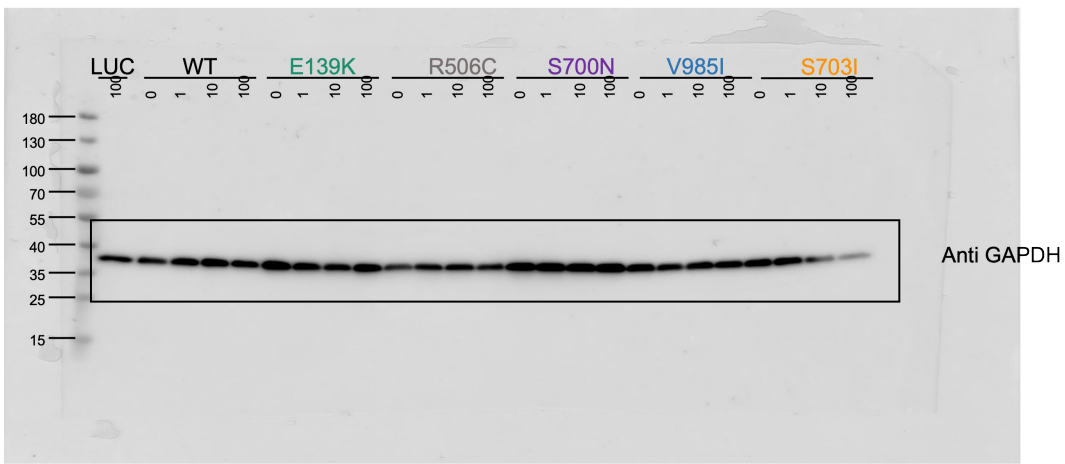

Supplement: JEM_20232387_SourceDataF2.pdf [file JEM_20232387_SourceDataF2.pdf]
