# Supplementary figures and images for: Individuals with JAK1 variants are affected by syndromic features encompassing autoimmunity, atopy, colitis, and dermatitis
Source: PubMed Central journal article supplement — J Exp Med. 2024 Apr 2;221(6):e20232387. doi: 10.1084/jem.20232387 (PMC10986756; doi:10.1084/jem.20232387), 2024-04-02

Figure 3g

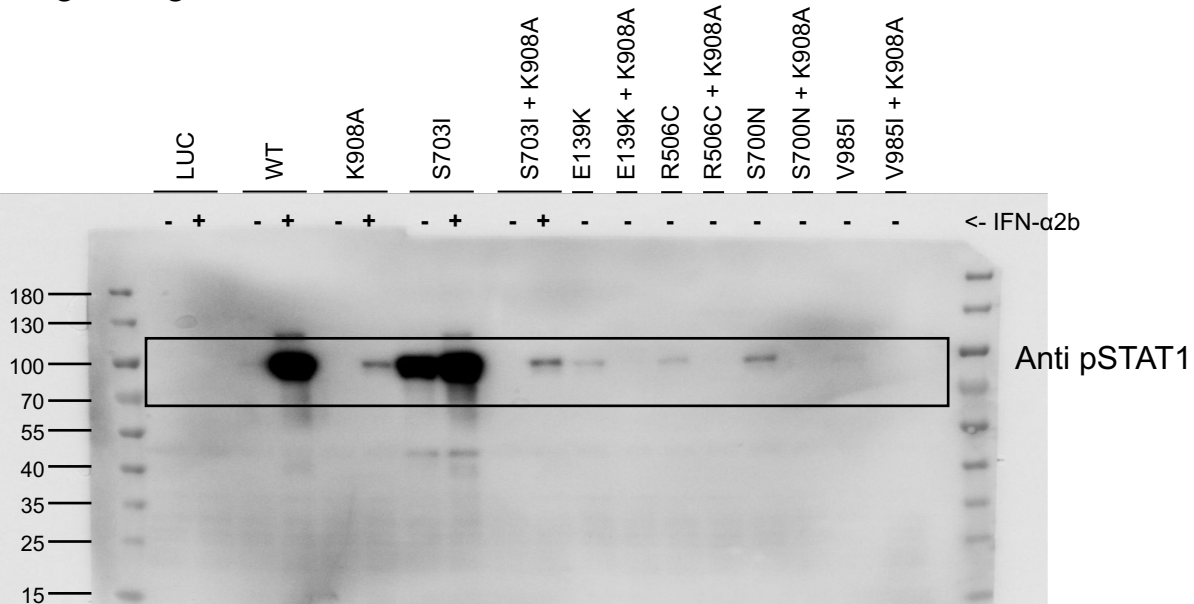

Figure 3g

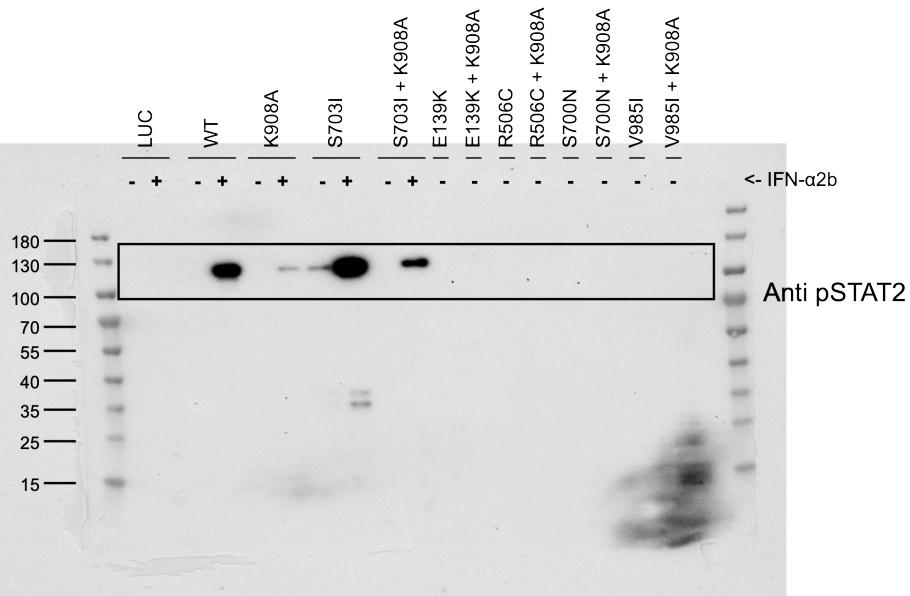

Figure 3g

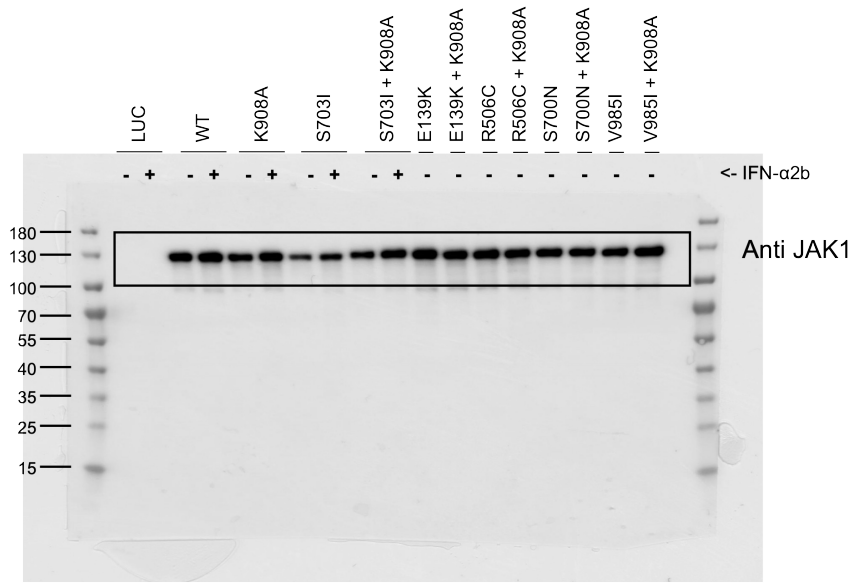

Figure 3g

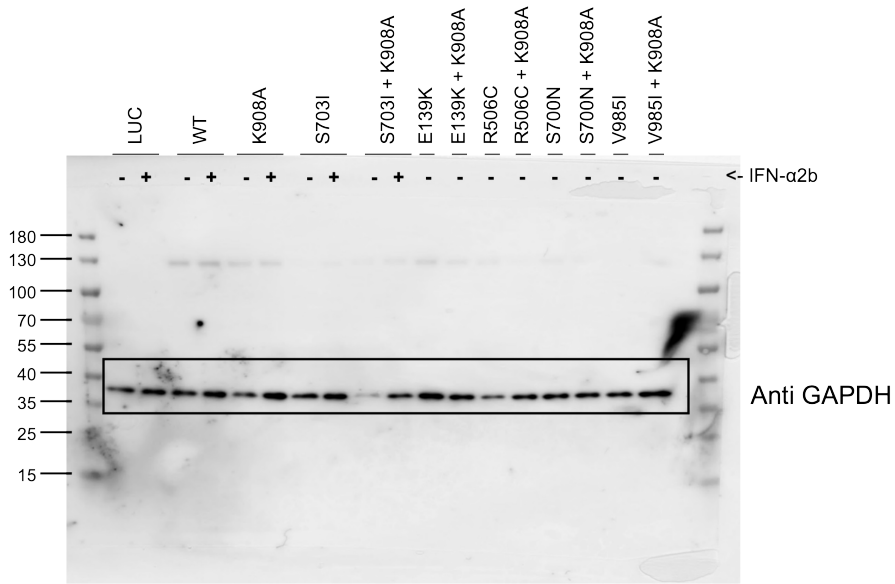

Figure 3h

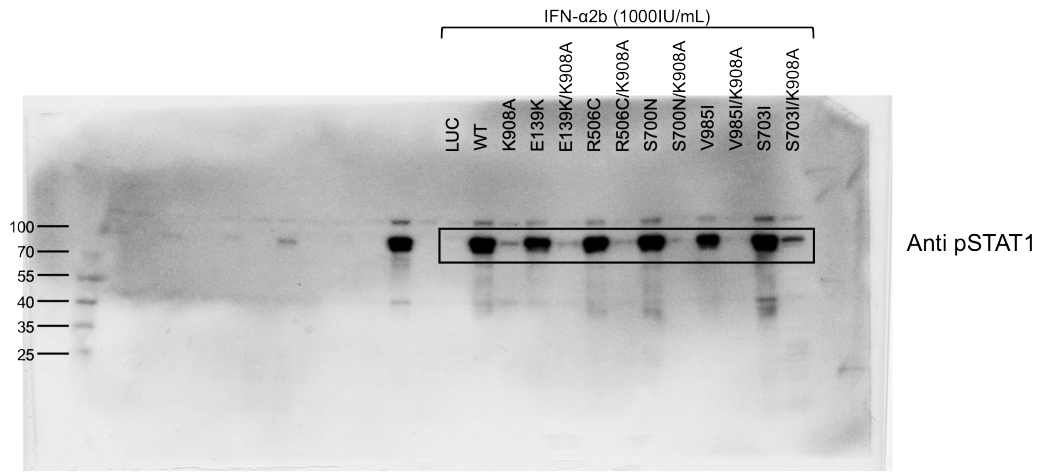

Figure 3h

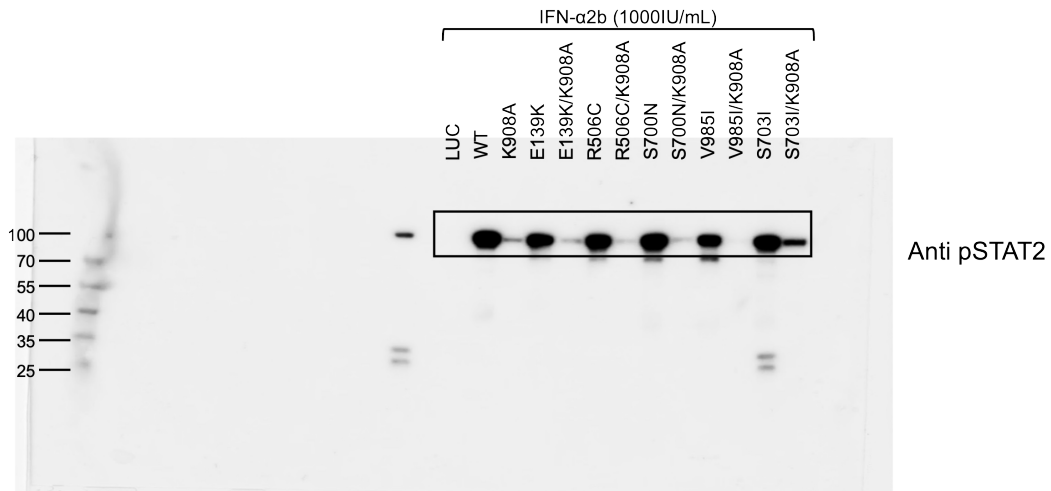

Figure 3h

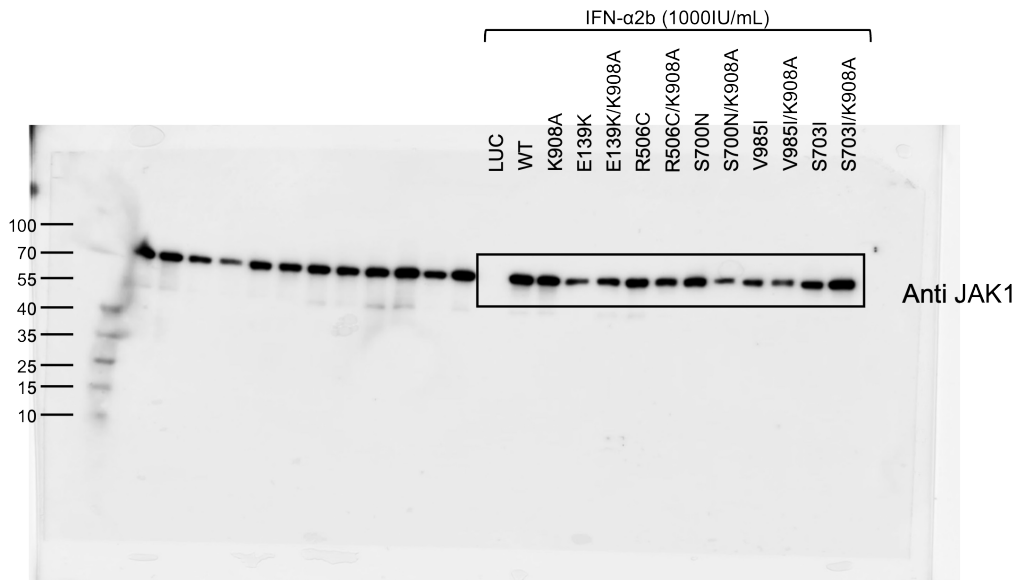

Figure 3h

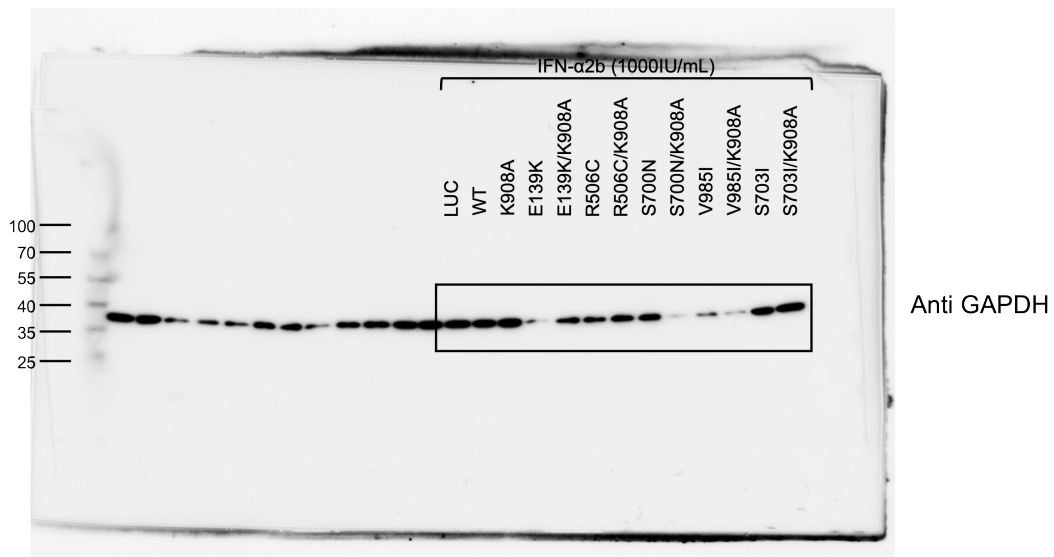

Supplement: JEM_20232387_SourceDataF3.pdf [file JEM_20232387_SourceDataF3.pdf]
